# Supplementary material for: Insurance loss model vs meteorological loss index – How comparable are their loss estimates for European windstorms?
Source: Copernicus journal article supplement (doi:10.5194/nhess-2024-16), 2024-02-28
Supplement: Supplementary file 2 [file nhess-2024-16-supplement.pdf]

Supplementary Material for

**Insurance loss model vs meteorological loss index – How comparable are their loss estimates for European windstorms?**

J. Moemken et al.

*Correspondence to:* J. Moemken ([julia.moemken@kit.edu](mailto:julia.moemken@kit.edu))

**Table S1:** Historical event set of insured winter windstorms in Aon's IF Euro WS model in the period 1990-2020, including storm name and event date (as yyyy-mm-dd).

| <b>STORM</b> | <b>DATE</b> |
|--------------|-------------|
| Daria        | 1990-01-25  |
| Anatol       | 1999-12-03  |
| Lothar       | 1999-12-26  |
| Martin       | 1999-12-27  |
| Jeanett      | 2002-10-27  |
| Erwin        | 2005-01-07  |
| Kyrill       | 2007-01-16  |
| Emma         | 2008-03-01  |
| Klaus        | 2009-01-24  |
| Xynthia      | 2010-02-27  |
| Tappani      | 2011-12-26  |
| Christian    | 2013-10-26  |
| Xaver        | 2013-12-04  |
| Dirk         | 2013-12-23  |
| Tini         | 2014-02-12  |
| ElonFelix    | 2015-01-08  |
| MikeNiklas   | 2015-03-31  |
| Thomas       | 2017-02-23  |
| Zeus         | 2017-03-06  |
| Xavier(2017) | 2017-10-06  |
| Herwart      | 2017-10-29  |
| Eleanor      | 2018-01-02  |
| Friederike   | 2018-01-18  |
| Isaias       | 2019-02-08  |
| Eberhard     | 2019-03-10  |
| Sabine       | 2020-02-09  |

**Table S2:** List of top 20 storms from ERA5 for 1979-2019 for Core Europe. Information includes the storm name, storm rank, event period and value of Loss Index (LI). Shown are only the common 20 most extreme storms with ERA-Interim.

| Rank | Storm name                      | Start date | End date   | LI       |
|------|---------------------------------|------------|------------|----------|
| 1    | <b>Vivian, Wiebke</b>           | 1990-02-26 | 1990-02-28 | 769794.9 |
| 2    | <b>Kyrill, Lancelot</b>         | 2007-01-18 | 2007-01-20 | 724570.7 |
| 3    | <b>Daria</b>                    | 1990-01-25 | 1990-01-28 | 691602.4 |
| 4    | <b>Kurt, Lothar, Martin</b>     | 1999-12-23 | 1999-12-26 | 639103.5 |
| 5    | <b>13 Jan 84, 14 Jan 84</b>     | 1984-01-12 | 1984-01-15 | 573311.1 |
| 6    | <b>Verena</b>                   | 1993-01-12 | 1993-01-15 | 527002.6 |
| 7    | <b>Jeanett, Katharina, Lara</b> | 2002-10-25 | 2002-10-28 | 503317.0 |
| 8    | <b>Nov 84</b>                   | 1984-11-22 | 1984-11-24 | 487979.3 |
| 9    | <b>Braer, 13 Jan 93</b>         | 1993-01-11 | 1993-01-14 | 485094.7 |
| 10   | <b>Andrea, Ulli</b>             | 2012-01-03 | 2012-01-05 | 482571.3 |
| 11   | <b>Lore</b>                     | 1994-01-25 | 1994-01-28 | 468993.4 |
| 12   | <b>CE1</b>                      | 1997-02-24 | 1997-02-26 | 435918.6 |
| 13   | <b>Herta</b>                    | 1990-02-01 | 1990-02-04 | 435159.4 |
| 14   | <b>Dec-93</b>                   | 1993-12-08 | 1993-12-11 | 423932.7 |
| 15   | <b>Mike, Niklas</b>             | 2015-03-29 | 2015-03-31 | 423640.9 |
| 16   | <b>Franz, Hanno, Gerhard</b>    | 2007-01-10 | 2007-01-13 | 421784.4 |
| 17   | <b>Jan-95</b>                   | 1995-01-21 | 1995-01-24 | 416758.5 |
| 18   | <b>Johanna, Kirsten</b>         | 2008-03-10 | 2008-03-12 | 396952.7 |
| 19   | <b>Gernot, Ingmar, Burglind</b> | 2018-01-01 | 2018-01-03 | 391770.7 |
| 20   | <b>11 Feb 90</b>                | 1990-02-11 | 1990-02-14 | 390314.1 |

**Table S3:** Same as Table S2, but for ERA-Interim.

| <b>Rank</b> | <b>Storm name</b>                      | <b>Start date</b> | <b>End date</b> | <b>LI</b> |
|-------------|----------------------------------------|-------------------|-----------------|-----------|
| 1           | <b>Vivian, Wiebke</b>                  | 1990-02-26        | 1990-03-01      | 81503.9   |
| 2           | <b>Daria</b>                           | 1990-01-25        | 1990-01-28      | 76591.4   |
| 3           | <b>Kyrill, Lancelot</b>                | 2007-01-18        | 2007-01-20      | 70723.7   |
| 4           | <b>Kurt, Lothar, Martin</b>            | 1999-12-25        | 1999-12-27      | 67481.7   |
| 5           | <b>Jeanett, Katharina, Lara</b>        | 2002-10-25        | 2002-10-28      | 64321.1   |
| 6           | <b>13 Jan 84, 14 Jan 84</b>            | 1984-01-12        | 1984-01-15      | 56511.3   |
| 7           | <b>Nov 84</b>                          | 1984-11-22        | 1984-11-25      | 51238.6   |
| 8           | <b>Dec-93</b>                          | 1993-12-08        | 1993-12-11      | 50957.0   |
| 9           | <b>Mike, Niklas</b>                    | 2015-03-29        | 2015-03-31      | 49616.4   |
| 10          | <b>Verena</b>                          | 1993-01-12        | 1993-01-15      | 49027.0   |
| 11          | <b>Andrea, Ulli</b>                    | 2012-01-03        | 2012-01-06      | 48946.2   |
| 12          | <b>Johanna, Kirsten</b>                | 2008-03-10        | 2008-03-13      | 47165.6   |
| 13          | <b>CE1</b>                             | 1997-02-24        | 1997-02-26      | 47125.3   |
| 14          | <b>Lore</b>                            | 1994-01-25        | 1994-01-28      | 46779.8   |
| 15          | <b>Jan-95</b>                          | 1995-01-21        | 1995-01-24      | 46234.1   |
| 16          | <b>Gernot, Ingmar, Horst, Burglind</b> | 2018-01-01        | 2018-01-04      | 45150.2   |
| 17          | <b>13 Jan 93</b>                       | 1993-01-11        | 1993-01-14      | 44229.0   |
| 18          | <b>Herta</b>                           | 1990-02-01        | 1990-02-04      | 43373.9   |
| 19          | <b>11 Feb 90</b>                       | 1990-02-11        | 1990-02-14      | 41585.6   |
| 20          | <b>Franz, Hanno, Gerhard</b>           | 2007-01-10        | 2007-01-13      | 38258.8   |

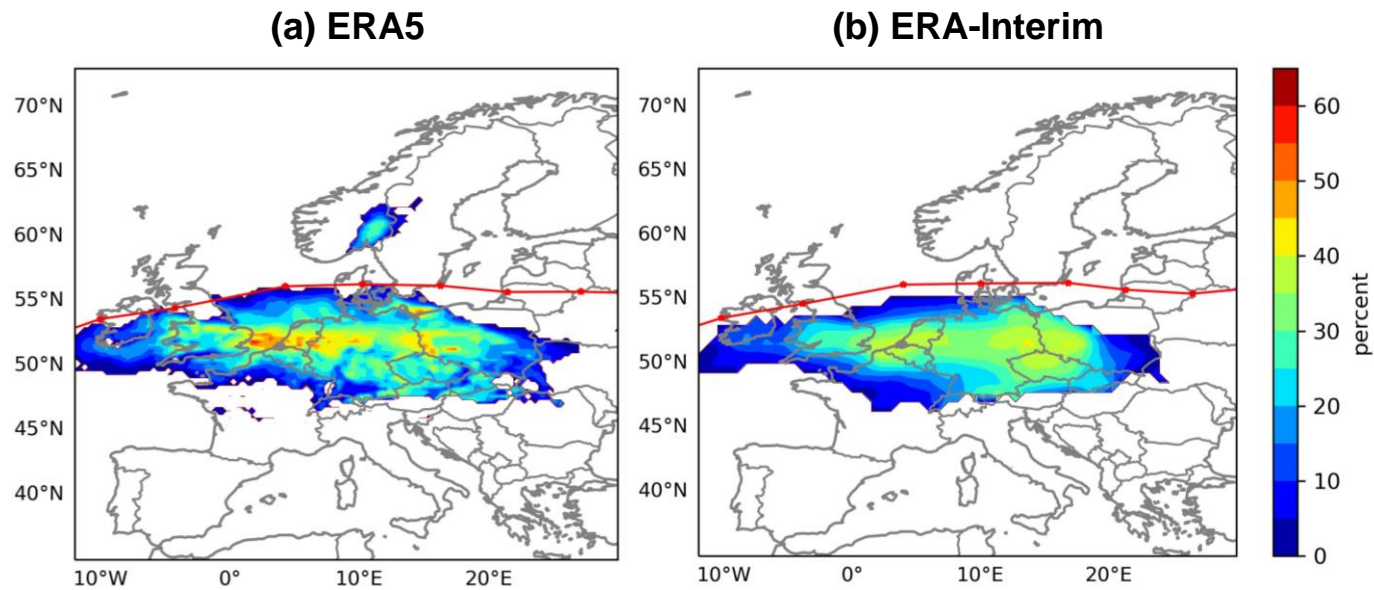

**Figure S1:** Wind gust footprint for storm Irina in October 2022 based on ERA5 (a) and ERA-Interim (b). Shown is the percentage of the maximum wind gust in 72 hours that exceeded the 98<sup>th</sup> percentile of daily maximum wind gust. The red line and dots denote the cyclone track derived from ERA5 using the tracking algorithm of *Pinto et al. (2005)*.

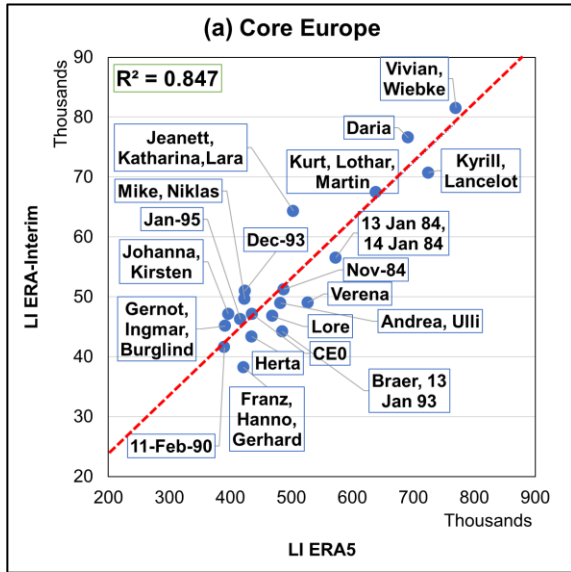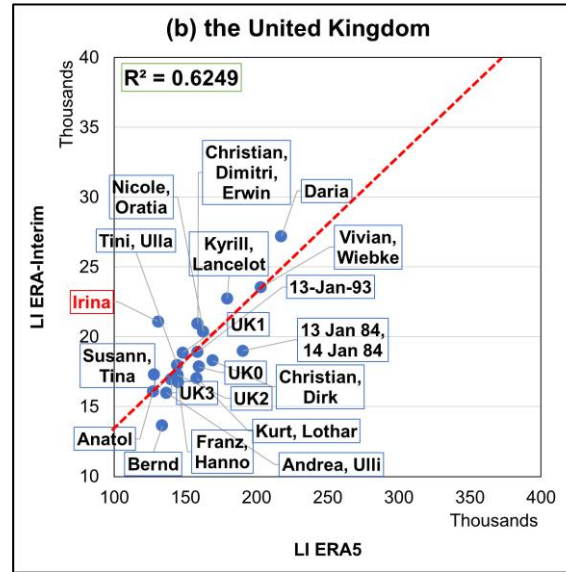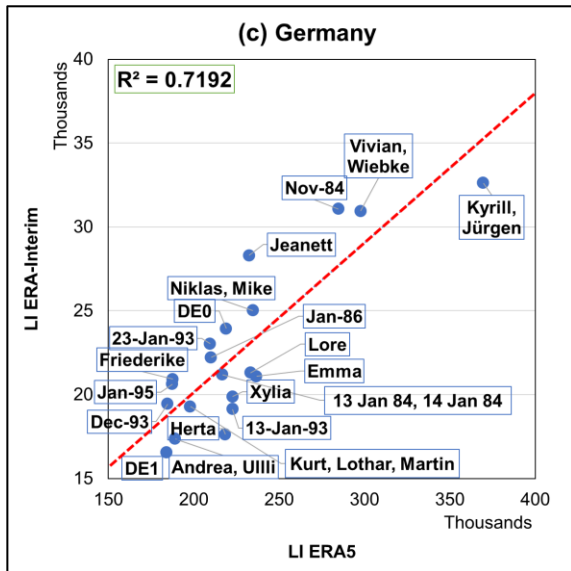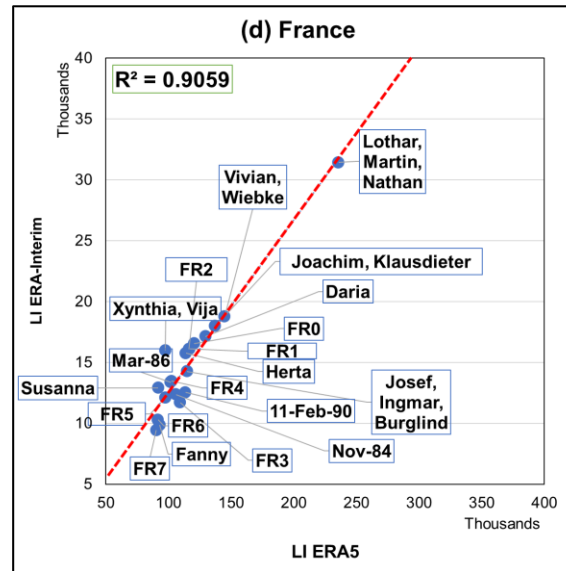

**Figure S2:** Comparison of loss values (in thousands) based on LI ERA5 (x-axis) and LI ERA-Interim (y-axis). Depicted are the common 20 most extreme storms in the period 1979-2019 for (a) Core Europe, (b) the United Kingdom, (c) Germany, and (d) France. Corresponding storm names to each data point are marked with a blue line. Storms without a formal name are named based on the region (e.g. CE for Core Europe) and the loss value (starting for zero for storm with highest loss). The red dashed line denotes the linear regression line. The correlation between the datasets is given in the upper left corner. Outlier storms based on the IQR method (see section 3.2) are marked in red. Please note the different scales.
